# Supplementary material
Source: PubMed Central journal article supplement (PMC3856437)

## Cellular Delivery and Photochemical Activation of Antisense Agents through a Nucleobase Caging Strategy

Jeane M. Govan<sup>1</sup>, Rajendra Uprety<sup>1</sup>, Meryl Thomas<sup>1</sup>, Hrvoje Lusic<sup>1</sup>, Mark O. Lively<sup>2</sup>, and Alexander Deiters<sup>1,\*</sup>

<sup>1</sup>North Carolina State University, Department of Chemistry, Raleigh, NC 27695, and <sup>2</sup>Wake Forest University School of Medicine, Center for Structural Biology, Winston-Salem, NC 27157  
alex\_deiters@ncsu.edu

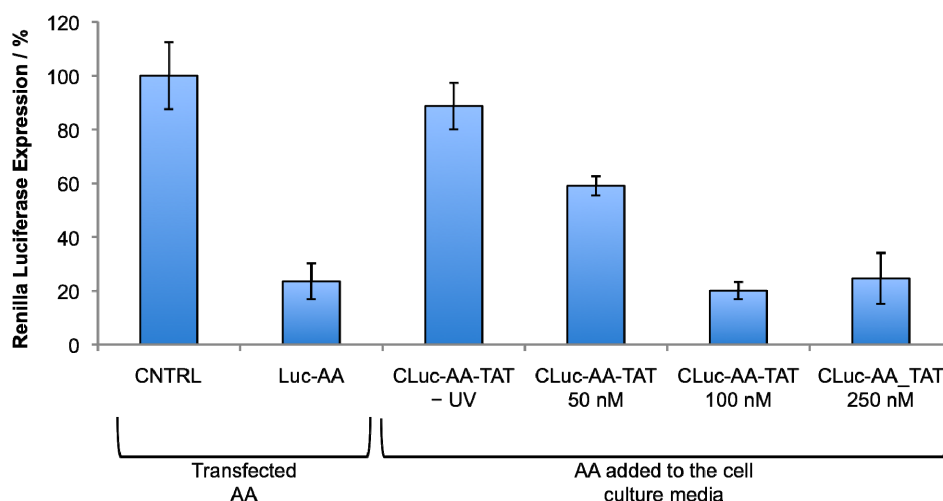

**Supporting Figure 1.** Titration of HIV TAT conjugated antisense agents. Antisense agents (CNTRL and Luc-AA) were actively transfected into HEK293T cells. Increasing concentrations of CLuc-AA-TAT (0, 50, 100, 250 nM) were simply added to HEK293T cell culture media. Cells were either kept in the dark or irradiated (365 nm, 2 min, 25 W). The cells were expressing firefly and *Renilla* luciferase from pGL3 and pRL-TK plasmids, respectively, and a dual-luciferase assay was performed after 48 h. *Renilla* luciferase expression was normalized to firefly luciferase expression and the negative control antisense agent (CNTRL) was set to 100%. All experiments were performed in triplicate and error bars represent standard deviations.

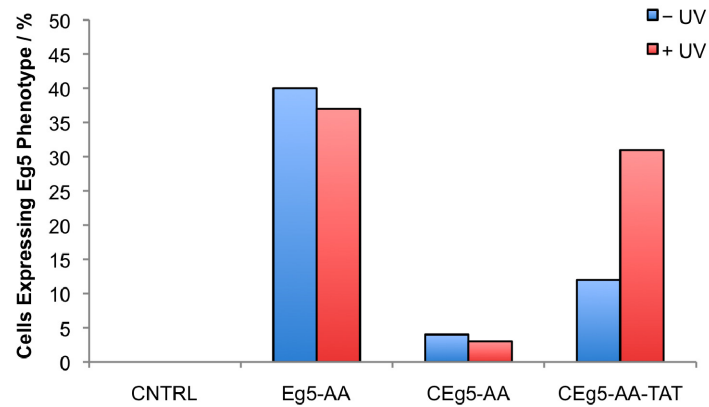

**Supporting Figure 2.** HeLa cells were passaged into 4-well chamber slide (1 mL per well,  $\sim 4 \times 10^4$  cells per well) and grown to  $\sim 70\%$  confluence within 24 h. Conjugated antisense agents (100 nM) were added directly to the cell culture media and incubated overnight at 37 °C, 5% CO<sub>2</sub>. The media was removed and the cells were irradiated for 2 min on a UV transilluminator (365 nm, 25 W). Control antisense agents were transfected into the cells with X-tremeGENE siRNA reagent (Roche). DMEM media was added and the cells were incubated at 37 °C, 5% CO<sub>2</sub> for 48 h. The cells were fixed with formaldehyde (3.75%) and permeabilized with Triton-X100, stained with Alexa Fluor 488 Phalloidin (ex/em 488 nm/495-630 nm, Invitrogen) and DAPI (ex/em 405 nm/410-495 nm, Invitrogen). 100 total cells were counted for the binucleated phenotype and plotted against the antisense agent treatment.

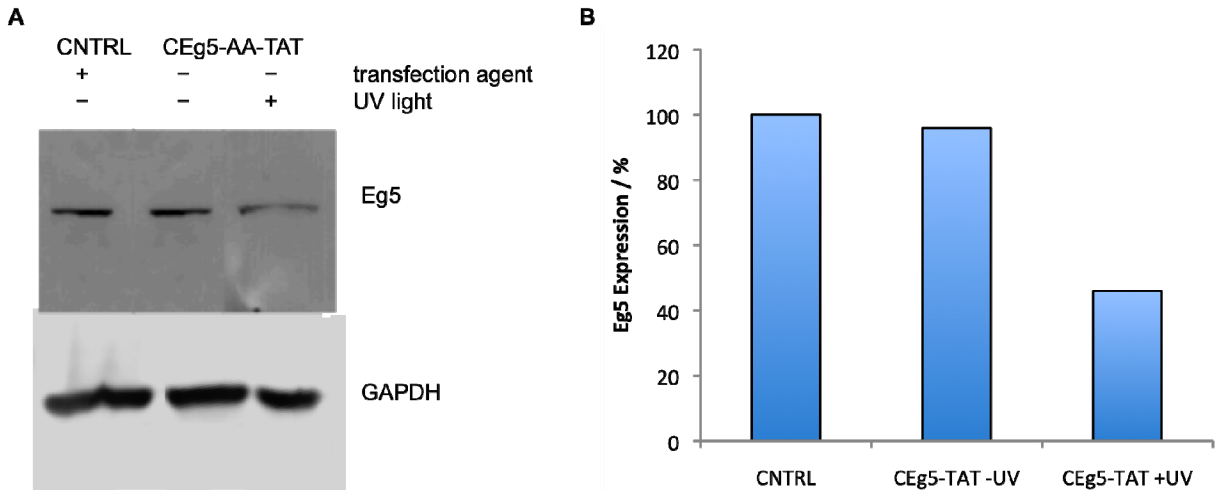

**Supporting Figure 3.** Western Blot of photochemical Eg5 inhibition. HeLa cells were passaged into 6-well plates (2 mL per well,  $\sim 2 \times 10^5$  cells per well) and grown to  $\sim 70\%$  confluence within 24 h. Conjugated antisense agents (100 nM) were added directly to the cell culture media and incubated overnight at 37 °C, 5% CO<sub>2</sub>. The media was removed and the cells were irradiated for 2 min on a UV transilluminator (365 nm, 25 W). Control antisense agents were transfected into the cells with X-tremeGENE siRNA reagent (Roche). DMEM media was added and the cells were incubated at 37 °C, 5% CO<sub>2</sub> for 48 h. The cells were lysed with mammalian protein extraction buffer (GE Healthcare) and the lysate was analyzed by 12 % SDS-PAGE. A Western blot was performed using Eg5 (1:500 dilution, Santa Cruz Biotechnology) and GAPDH (1:1,000 dilution, Santa Cruz Biotechnology) primary antibodies, and a goat-anti-mouse-HRP (1:1,000 dilution, Santa Cruz Biotechnology) secondary antibody. The Western blot was developed by HRP colorimetric staining (Bio-Rad) and (A) imaged on a Typhoon 7000 phosphorimager (GE Healthcare). (B) The bands were quantified with *ImageQuant TL* software and the bands corresponding to Eg5 expression were normalized to GAPDH expression bands. For normalization purposes, the CNTRL antisense agent was set to 100% Eg5 expression.

# <sup>1</sup>H NMRs of synthesized compounds:

STANDARD 1H OBSERVE

Pulse Sequence: s2pu1  
Solvent: CDCl3  
Ambient temperature  
File: nitropropargylvaniline  
Mercury-300BB "ncsummer638"  
Relax. delay 1.000 sec  
Pulse 45.7 degrees  
Acq. time 1.995 sec  
Width 4296.5 Hz  
18 repetitions  
OBSERVE H1, 300.0954380 MHz  
DATA PROCESSING  
F1 size 32768  
Total time 0 min, 49 sec

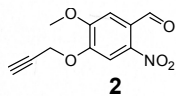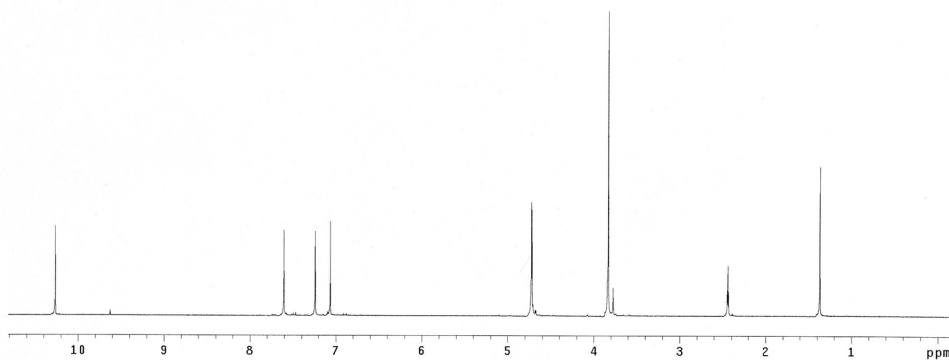

STANDARD 1H OBSERVE

Pulse Sequence: s2pu1  
Solvent: DMSO  
Ambient temperature  
File: nitrosubvanilinealcohol  
Mercury-300BB "ncsummer638"  
Relax. delay 1.000 sec  
Pulse 45.7 degrees  
Acq. time 1.985 sec  
Width 4296.5 Hz  
18 repetitions  
OBSERVE H1, 300.0968000 MHz  
DATA PROCESSING  
F1 size 32768  
Total time 0 min, 49 sec

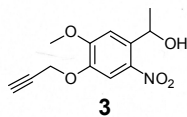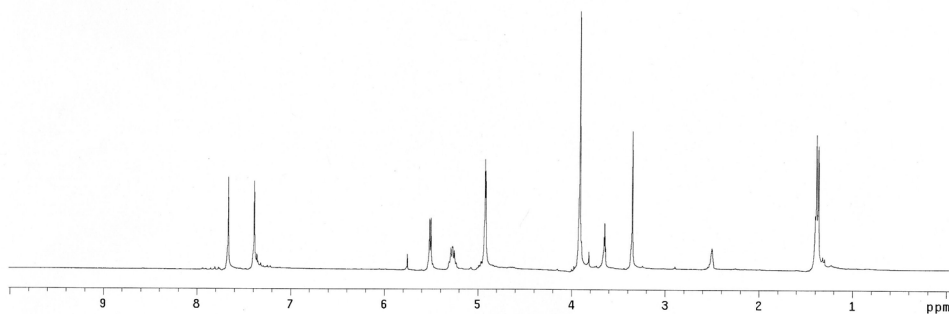

STANDARD 1H OBSERVE

Pulse Sequence: s2pu1  
Solvent: CDCl3  
Ambient temperature  
File: ruthioether21-2  
Mercury-300BB "ncsumerc300"  
Relax. delay 1.000 sec  
Pulse 36.0 degrees  
Acq. time 1.995 sec  
Width 4506.5 Hz  
18 repetitions  
OBSERVE H1, 299.7918101 MHz  
DATA PROCESSING  
FT size 32768  
Total time 0 min, 49 sec

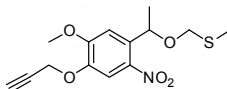

4

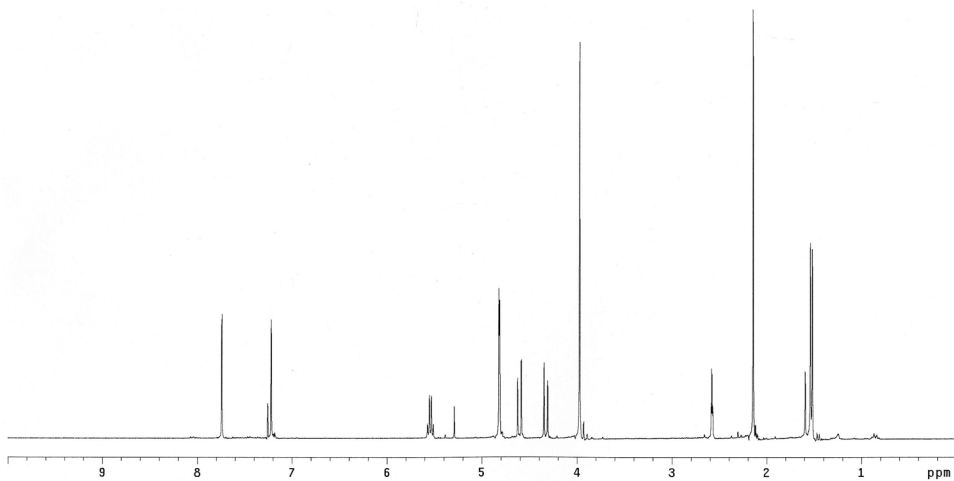

ru-alkyne-caged-DMTrO-Thymidine-1H

Pulse Sequence: s2pu1  
Solvent: CDCl3  
Ambient temperature  
Mercury-300BB "ncsumerc300"  
Relax. delay 1.000 sec  
Pulse 36.0 degrees  
Acq. time 1.995 sec  
Width 4506.5 Hz  
18 repetitions  
OBSERVE H1, 299.7918160 MHz  
DATA PROCESSING  
FT size 32768  
Total time 0 min, 49 sec

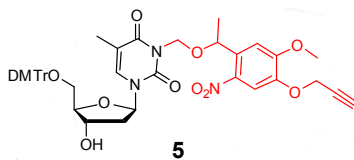

5

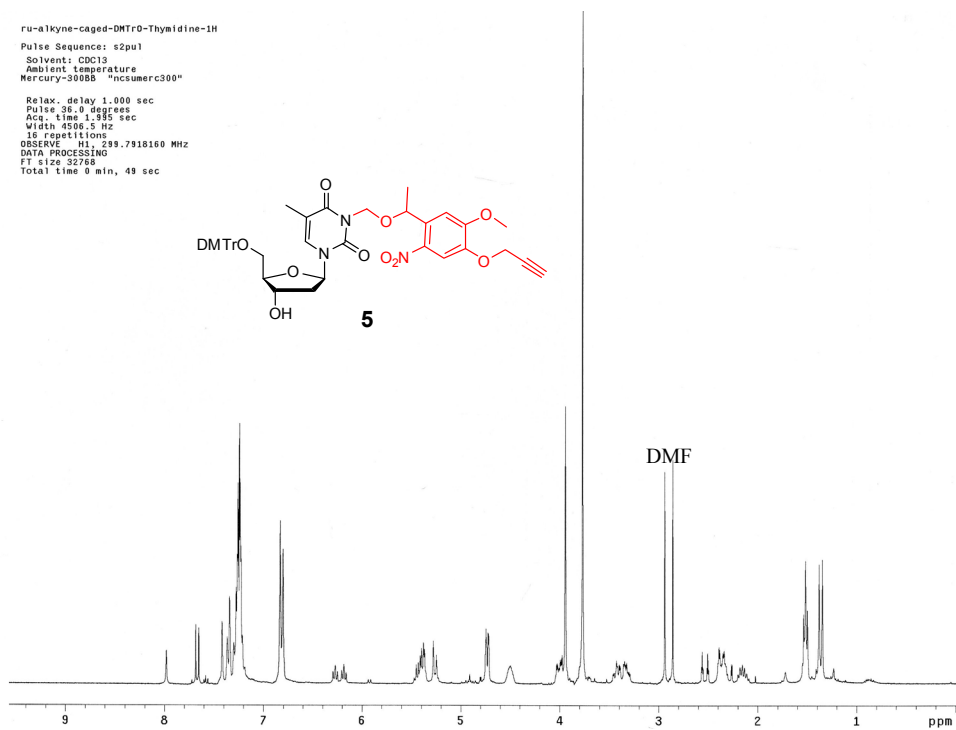

STANDARD 1H OBSERVE

Pulse Sequence: e2pu1  
Solvent: CDCl3  
Ambient temperature  
File: h1031086-1H-phosphoramidite-Thy-DMT-ACG  
Mercury-300BB "ncsummerc30B"

Relax. delay 1.000 sec  
Pulse 36.0 degrees  
Acq. time 1.395 sec  
Width 4506.5 Hz  
18 repetitions  
OBSERVE: H1, 299.7918101 MHz  
DATA PROCESSING  
F1 size 32768  
Total time 0 min, 49 sec

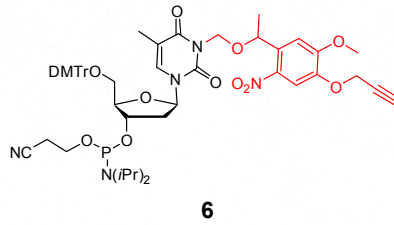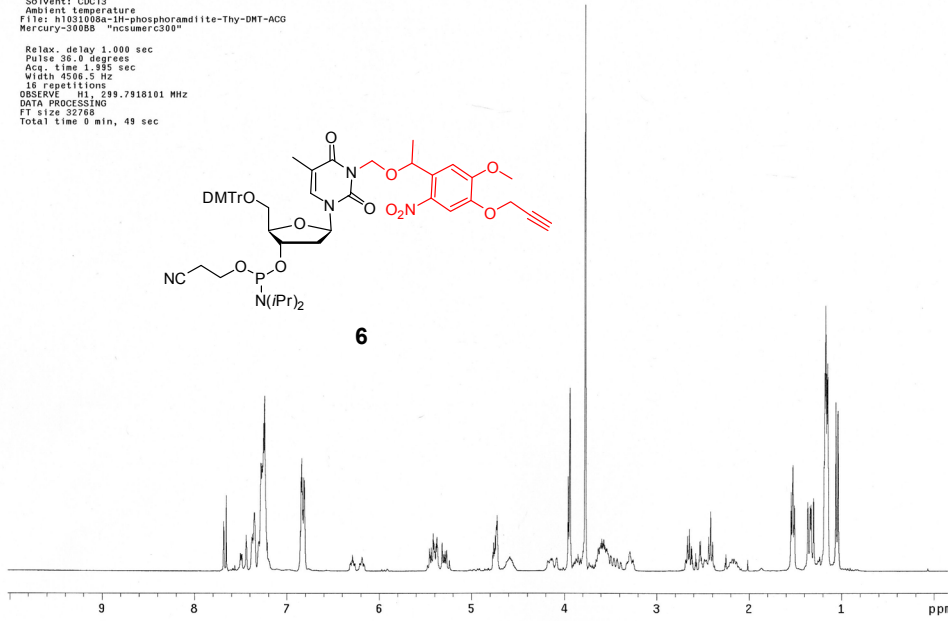

MT03-169  
MT03-169

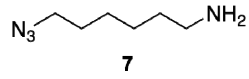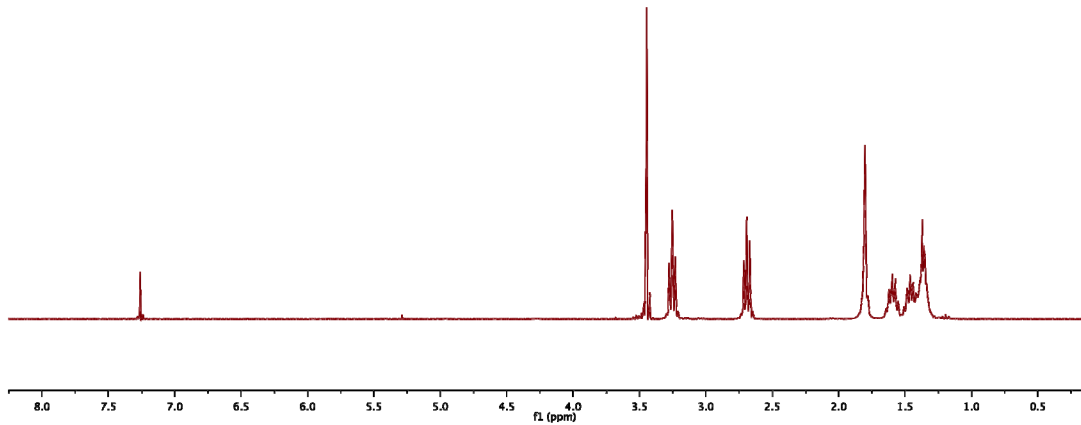

MT04-110-ON  
MT04-110-HPLC

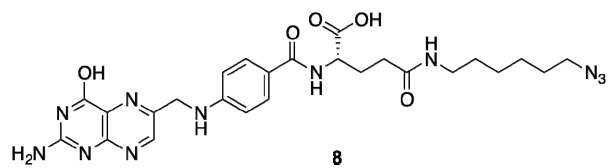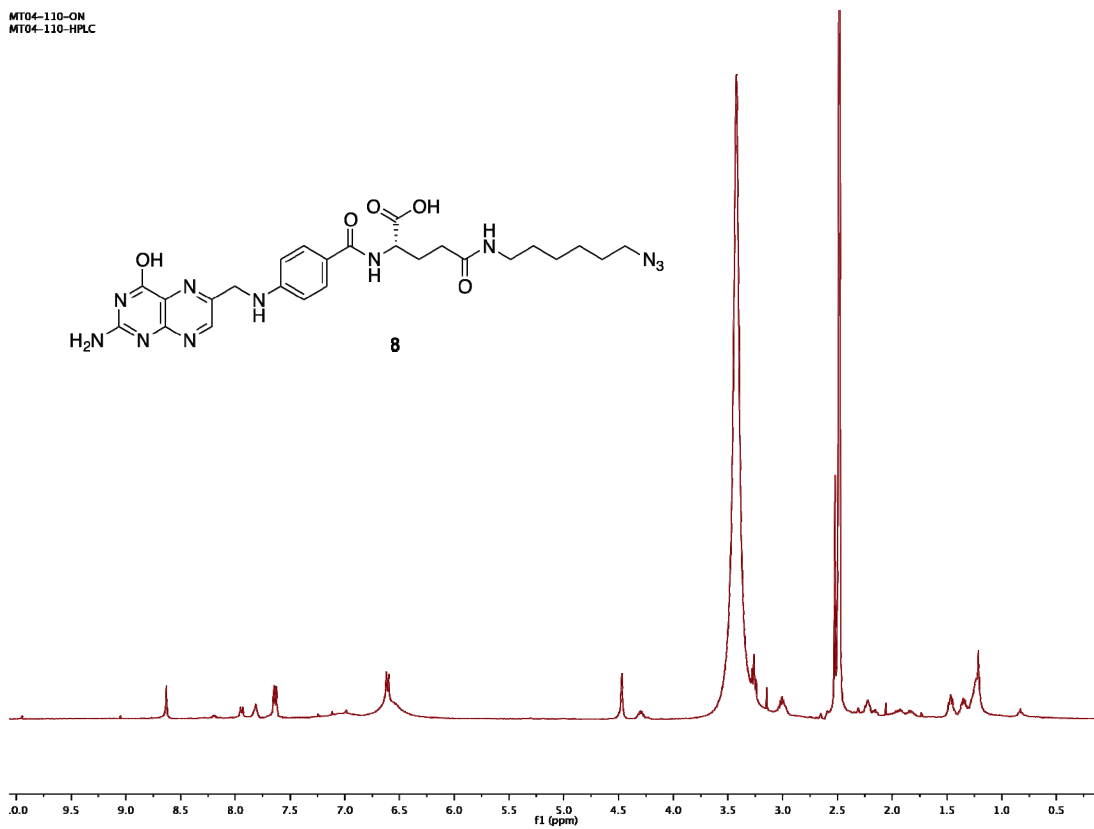

Supplement: NIHMS517262-supplement-1_si_001.pdf [file NIHMS517262-supplement-1_si_001.pdf]
